# Supplementary material for: Diagnosis, Management and Prescription Practices of Adrenaline in Children with Food-Induced Anaphylaxis: Audit in a Specialized Pediatric Allergy Department
Source: MDPI journal article supplement (doi:10.3390/jpm12091477), 2022-09-09
Supplement: s1 [file s1]

**PEDIATRIC FOOD-INDUCED ANAPHYLAXIS**  
**HISTORY FORM**

Date : .....

Medical File Number :

Address :

Name - Surname :

Telephone Number :

Gender : ☐ Male / ☐ Female

E-mail :

Date of Birth :

Attending Physician :

|                                                                                                                              |                                                                                                                                                                                                                   |                                                                                                                         |                        |
|------------------------------------------------------------------------------------------------------------------------------|-------------------------------------------------------------------------------------------------------------------------------------------------------------------------------------------------------------------|-------------------------------------------------------------------------------------------------------------------------|------------------------|
| <b>Culprit Food Allergen</b>                                                                                                 | Dairy <input type="radio"/> Eggs <input type="radio"/> Wheat <input type="radio"/> Peanut <input type="radio"/> Nuts <input type="radio"/><br>Fish <input type="radio"/> Seafood <input type="radio"/><br>Other : |                                                                                                                         |                        |
| <b>Symptoms Recording per System</b>                                                                                         |                                                                                                                                                                                                                   |                                                                                                                         |                        |
| Sudden onset of skin symptoms<br><i>(pruritus or erythema)</i>                                                               | YES <input type="radio"/>                                                                                                                                                                                         | NO <input type="radio"/>                                                                                                |                        |
| Sudden onset of angioedema<br><i>(lips or tongue)</i>                                                                        | YES <input type="radio"/>                                                                                                                                                                                         | NO <input type="radio"/>                                                                                                |                        |
| Upper respiratory system symptoms<br><i>(sudden onset rhinorrhea, sneezing, hoarseness, "barky" cough, throat tightness)</i> | YES <input type="radio"/>                                                                                                                                                                                         | NO <input type="radio"/>                                                                                                |                        |
| Lower respiratory system symptoms<br><i>(shortness of breath / dyspnea, wheezing, cyanosis)</i>                              | YES <input type="radio"/>                                                                                                                                                                                         | NO <input type="radio"/>                                                                                                |                        |
| Blood pressure drop<br><i>(hypotension, dizziness, syncope)</i>                                                              | YES <input type="radio"/>                                                                                                                                                                                         | NO <input type="radio"/>                                                                                                |                        |
| Persistent gastrointestinal symptoms<br><i>(persistent abdominal pain, vomiting)</i>                                         | YES <input type="radio"/>                                                                                                                                                                                         | NO <input type="radio"/>                                                                                                |                        |
| <b>Vital Signs (during the episode)</b>                                                                                      |                                                                                                                                                                                                                   |                                                                                                                         |                        |
| Blood Pressure                                                                                                               | mmHg                                                                                                                                                                                                              | SatO <sub>2</sub>                                                                                                       | %      Heart Rate /min |
| <b>Anaphylaxis Diagnosis (based on EAACI's definition)</b>                                                                   |                                                                                                                                                                                                                   |                                                                                                                         |                        |
| Anaphylaxis Diagnosis (based on EAACI's definition)                                                                          |                                                                                                                                                                                                                   | YES <input type="radio"/> NO <input type="radio"/>                                                                      |                        |
| Grade (based on Sampson's criteria)                                                                                          |                                                                                                                                                                                                                   | 1 <input type="radio"/> 2 <input type="radio"/> 3 <input type="radio"/> 4 <input type="radio"/> 5 <input type="radio"/> |                        |
| <b>Medications for future episode prescription</b>                                                                           |                                                                                                                                                                                                                   |                                                                                                                         |                        |
| Adrenaline                                                                                                                   | YES <input type="radio"/>                                                                                                                                                                                         | NO <input type="radio"/>                                                                                                |                        |
| Antihistamine                                                                                                                | YES <input type="radio"/>                                                                                                                                                                                         | NO <input type="radio"/>                                                                                                |                        |
| Cortisone                                                                                                                    | YES <input type="radio"/>                                                                                                                                                                                         | NO <input type="radio"/>                                                                                                |                        |
| β <sub>2</sub> -agonist                                                                                                      | YES <input type="radio"/>                                                                                                                                                                                         | NO <input type="radio"/>                                                                                                |                        |
