# Supplementary material for: Diagnosis, Management and Prescription Practices of Adrenaline in Children with Food-Induced Anaphylaxis: Audit in a Specialized Pediatric Allergy Department
Source: MDPI journal article supplement (doi:10.3390/jpm12091477), 2022-09-09
Supplement: s1 [file s1]

**Table S1:** Grading of Food-Induced Anaphylaxis According to Severity of Clinical Symptoms<sup>†</sup>

| GRADE | SKIN                                                  | GASTRO-<br>INTESTINAL                             | RESPIRATORY                                                                                     | CARDIOVASCULAR                                          | NEUROLOGICAL                                  |
|-------|-------------------------------------------------------|---------------------------------------------------|-------------------------------------------------------------------------------------------------|---------------------------------------------------------|-----------------------------------------------|
| 1     | Localized pruritus, flushing, urticaria, angioedema   | Oral pruritus, oral “tingling,” mild lip swelling |                                                                                                 |                                                         |                                               |
| 2     | Generalized pruritus, flushing, urticaria, angioedema | Any of the above, nausea and/or emesis x’s 1      | Nasal congestion and/or sneezing                                                                |                                                         | Change in activity level                      |
| 3     | Any of the above                                      | Any of the above plus repetitive vomiting         | Rhinorrhea, marked congestion, sensation of throat pruritus or tightness                        | Tachycardia (increase >15 beats/min)                    | Change in activity level plus anxiety         |
| 4     | Any of the above                                      | Any of the above plus diarrhea                    | Any of the above, hoarseness, “barky” cough, difficulty swallowing, dyspnea, wheezing, cyanosis | Any of the above, dysrhythmia and/or mild hypotension   | “Light headedness,” feeling of “pending doom” |
| 5     | Any of the above                                      | Any of the above, loss of bowel control           | Any of the above, respiratory arrest                                                            | Severe bradycardia and/or hypotension or cardiac arrest | Loss of consciousness                         |

†. Sampson, H.A. Anaphylaxis and emergency treatment. *Pediatrics* **2003**, *111* (Pt 3), 1601–1608. Available online: <https://pubmed.ncbi.nlm.nih.gov/12777599/> (accessed on 14 April 2022).
